# Supplementary material for: Structural basis of nucleosome assembly by the Abo1 AAA+ ATPase histone chaperone
Source: Nat Commun. 2019 Dec 17;10:5764. doi: 10.1038/s41467-019-13743-9 (PMC6917787; doi:10.1038/s41467-019-13743-9)
Supplement: Supplementary file 2 — Supplementary Information [file 41467_2019_13743_MOESM2_ESM.pdf]

Supplementary Information for

Structural Basis of Nucleosome Assembly  
by the Abo1 AAA+ ATPase Histone Chaperone

Cho et al.,

Yta7 (S. cerevisiae) .....  
Abol (S. pombe) .....  
lex-1 (C. elegans) 1 .....MPRS.....DGFSPRKNR  
ATAD2 (D. rerio) 1 MVNTRKSEH.....KPSPPFISGRTRSSQRNNPNLDEHNSRKEPSSDA.....NSSSPRLSP  
ATAD2A (M. musculus) .....  
ATAD2A (H. sapiens) 1 MVVLRSSLELHNHSAASATGSLDLSDFLSLEHIGRRRLRS...AGAAQKKPAATTAKAGDGSSVKEVET

Yta7 (S. cerevisiae) 1 ..MARNLRNRRGS...DVEDASN.....AKVGYETQIKDENGIHTTTTSLRKIN.....YA  
Abol (S. pombe) .....  
lex-1 (C. elegans) 15 RSARDHSRSYAGQCNEFDMDYAPSSRRSSGGVDNGYTRSGRKINHNRYEEEEYHEAISSEEDERRR  
ATAD2 (D. rerio) 55 PKRTR.....RQTPPSSTDTSPSPQS.....KGQRG.SWTMS.....KHCTRLSTGALQN.....  
ATAD2A (M. musculus) .....  
ATAD2A (H. sapiens) 68 YHRTRALRSRLKDAQNSSDS.....SFEKN.....V....EITEQLAN.....

Yta7 (S. cerevisiae) 48 EIEKVDFLEDDQVMDKDE.....TP.....VDVTSDEHHNNNQKGDDEDDDDVLVSPHENART  
Abol (S. pombe) 1 .....MKE.....EASEHGGSADETQ.ELSPVSDS..  
lex-1 (C. elegans) 85 TRSSNSMTYRQQVMAIDESKRQKVPAPAKRR.....IYLSDEEEEDFAEAAH.....VENTVP  
ATAD2 (D. rerio) 99 .GHTIGRM.....SL..RGDSTSGGD..HARMNGH.....VE..  
ATAD2A (M. musculus) .....  
ATAD2A (H. sapiens) 102 .GRHFTRLQLARQQADKKK.EEHREDEKVIPVTRSLRARNIVQSTEH..LHEDNGD.....VE..

Yta7 (S. cerevisiae) 102 NEELTNERNLRRK..AHDPEEDDESFEEDVDDDEEEEEEDEFEDYLDSDKDNRRRRRAADRKFVVP  
Abol (S. pombe) 25 SDEMPNNAKR...RRSQSMIANKRIHQAFQEDGEDWEE.....EEHKPAKRR.....YNT.  
lex-1 (C. elegans) 141 ..ERATRRSTRRR.SSMHE..ELGVSEQ.....E.....ESPVRRTR.KAAKRL..  
ATAD2 (D. rerio) 126 .....LKRSRVR.KSQFE..HLNQSLLFQDLVNSTAEAVLQEM.....DNISSTRQS..REVERL..  
ATAD2A (M. musculus) .....  
ATAD2A (H. sapiens) 154 .....VRRSCRI..RSRYS..GVNQSMFLDKLITNTAEAVLQKM.....DDMKMRRQRMRELEDL..

Yta7 (S. cerevisiae) 170 DPDDDEEYDEDEEGDRISHA.SSK.....RLKRANSR.....RTRS.SRHPETPPVRRALRSRT  
Abol (S. pombe) 76 .RSNESFSEGDDEPFEVSESALED.....ELSDSEDS.....FIRSVRSKPKYKPGTRRSTRLN  
lex-1 (C. elegans) 179 .....GS..EQPEENLAADDPLMEGGGEI.VLPIAEIDGMAEQENEDLIEKIGREEEEG..  
ATAD2 (D. rerio) 177 .....RMWTDTELENM.....DMYSRVKRRKSLRRNTYGM..QSHHKVMSKSKDPEEEEG..  
ATAD2A (M. musculus) .....  
ATAD2A (H. sapiens) 206 .....GVFNEETESNL.....NMYTRGKQKDIQRTDEET..DNQEGSVESSEEGEDQEH.....

Yta7 (S. cerevisiae) 225 RHSRTSNEENDENDNSRNEALTDAEI..RELQEDSPIREKRF...LERTKPVNYKLPPPLTASNAEEFID  
Abol (S. pombe) 131 RRSQD.....EESEEEHRPILERTSRINYSVPLAFFPVDEM..G  
lex-1 (C. elegans) 232 ..AEDEQ.SGE.....KDPEEEDDSNAESSEESTAPRQYSLRRQPVVQFNASEARENRRAR..  
ATAD2 (D. rerio) 225 ..TEESNEE.GEEDVEDADDEDEGDEA.EEAGEENDRPYNLRQKRTVQRVEAPPEPVNRKQS..  
ATAD2A (M. musculus) .....  
ATAD2A (H. sapiens) 254 ..EDDGEDEDDDDDDDDDDDDDEDEDEEDGEEENQKRYYLQRKATVYQAPLEKPRHQRK...

Yta7 (S. cerevisiae) 293 KNNNALSFHNPSPARRGGWNASQNSGPTRRLLFPTGGPFGNDVTTIFGKN.TNFYNQVPSAF..S...  
Abol (S. pombe) 171 D...PSSQVNSRSRKTHSEL.....AITKLLRQQVSSFPMPYIDSSGSES..  
lex-1 (C. elegans) 289 .....LEHHRVANQRH.HRRNGS.....RR.....RRSLSDS..  
ATAD2 (D. rerio) 288 ..KGSFLDTHRSPA.....RRS.....HIRI..KKHAIHSSSTSS..  
ATAD2A (M. musculus) 1 .....MS.....LLKM.....RRHAHSSSDSTSSS..  
ATAD2A (H. sapiens) 318 ..PNIFYSGPASPAPRY.RLSSAGPRSPYCK.....RMNR.....RRHAHSSSDSTSSS..  

**AAA1**

Yta7 (S. cerevisiae) 357 DNNNNKLI...L...SDSSDDEI...LPLGVTPKTK.....KENTQKKKKKKPEIADLDPLGVDM  
Abol (S. pombe) 213 ESDNTRI.KK.....SSAKTIKALTDPANSG.....GPPDFGRIRKESDLADSPLGVDS  
lex-1 (C. elegans) 317 DSDDMVLP...PDKRQSRPHMHNRRGERERGRFMPINMTEKELQSAQHILMDMRMKTAGQGASDIPMSVDS  
ATAD2 (D. rerio) 319 SSDEERFERR.....KSKMSMRARNRCLPMNLRAEDLAS..GVLRDRV...KVGASLADVPMNLDT  
ATAD2A (M. musculus) 22 SE.DDCFERR.....TKNRNRRAINRCLPLNFRKDEI.R..GIYKDRM...KIGASLADVPMQLDT  
ATAD2A (H. sapiens) 366 SEDEQHFERR.....RKRSNRRAINRCLPLNFRKDEL.K..GIYKDRM...KIGASLADVPMQLDS

**AAA1**

Yta7 (S. cerevisiae) 409 NN...DDIGGLDNYIDQLKEMVALPLLYPELVQNFNITPPRCVLFHGGPGTGKTLMARALASCSDEKRI  
Abol (S. pombe) 262 SL...SFESVGGGLDNYINQLKEMVALPLLYPELVQNFNITPPRCVLFHGGPGTGKTLMARALASCSSENKRV  
lex-1 (C. elegans) 387 SV...GFDQVGGGLGHHIQSLKEVVLPLLYPELVQNFNITPPRCVLFHGGPGTGKTLMARALANECRRGANKV  
ATAD2 (D. rerio) 376 SV...KFDVGGGLTHHISLKEMVVPLLYPELVQNFNITPPRCVLFHGGPGTGKTLMARALANECRQGDKRV  
ATAD2A (M. musculus) 77 SV...RFDVGGGLSSHIAALKEMVPLLYPELVQNFNITPPRCVLFHGGPGTGKTLMARALANECRQGDKRV  
ATAD2A (H. sapiens) 422 SV...RFDVGGGLSNHIAALKEMVPLLYPELVQNFNITPPRCVLFHGGPGTGKTLMARALANECRQGDKRV

**AAA1**

Yta7 (S. cerevisiae) 479 T...FMRKGADILSKWVGEAERQRLRLLEAKKHQPSIIFDDEIDGLAPVRSSKOEIHASIVSTLLALMDG  
Abol (S. pombe) 332 S...FMRKGADCLSKWVGEAERQRLRLLEAKSTQPSIIFDDEIDGLAPVRSSKOEIHASIVSTLLALMDG  
lex-1 (C. elegans) 457 A...FMRKGADCLSKWVGEAERQRLRLLEQAYAMRPSIIFDDEIDGLAPVRSSKOEIHASIVSTLLALMDG  
ATAD2 (D. rerio) 446 A...FMRKGADCLSKWVGEAERQRLRLLEQAYLMRPSIIFDDEIDGLAPVRSSKOEIHASIVSTLLALMDG  
ATAD2A (M. musculus) 147 A...FMRKGADCLSKWVGEAERQRLRLLEQAYQMRPSIIFDDEIDGLAPVRSSKOEIHASIVSTLLALMDG  
ATAD2A (H. sapiens) 492 A...FMRKGADCLSKWVGEAERQRLRLLEQAYQMRPSIIFDDEIDGLAPVRSSKOEIHASIVSTLLALMDG

**AAA1**

Yta7 (S. cerevisiae) 549 MDNRGQVIVIGATNRPDVDPALRRPGRFDFEFYFPLPDVKARFKLQITOTRKWSS.PLSTNFIDKLAFL  
Abol (S. pombe) 402 MESRGQVIVIGATNRPDVDPALRRPGRFDFEFYFPLPDRDARKKTIETIRNWD.PVPEWLCSMLAEK  
lex-1 (C. elegans) 527 LDGRGEVIVIGATNRDLTDLPALRRPGRFDFELRFLPDLNARQTLDIHTSKWEEKPIPETLDAIAER  
ATAD2 (D. rerio) 516 LDSRGEIVVIGATNRLLSIDPALRRPGRFDFELFLNLPDKKARKHLEIHTRDWSP.KLAEPFIDELAEER  
ATAD2A (M. musculus) 217 LDSRGEIVVIGATNRLLSIDPALRRPGRFDFELFLSLPDKNARKELLKIHTRDWNP.KPVDMLLELAEH  
ATAD2A (H. sapiens) 562 LDSRGEIVVIGATNRLLSIDPALRRPGRFDFELFLSLPDKBARKELLLKIHTRDWNP.KPLDTFLELAEH

**AAA1**

Yta7 (S. cerevisiae) 618 TKGYGADLRSLCTEALISIQRSFPQIYRSNDKLLVDPKIKVKVSDFMALALKKIVPSSARSTGSSPQP  
Abol (S. pombe) 471 SKCYGADLRSLCTEALNSIKRTYPOLYRSTKRLQIDPKTIKVKVSDFMVSMKRMIPSSERSISPSKP  
lex-1 (C. elegans) 597 TS...CGADLKFLCTEAVLIGLRSYPHIYMGSERLKLDVATIKITSEHFGHAMRRITPASRRDLTIPSRP  
ATAD2 (D. rerio) 585 CVCYGADIKSICAEALCALRRYPQIYTSSEKQLDLSITINISAKDFEAMQKIMPASQRAVTSPPQA  
ATAD2A (M. musculus) 286 CVCYGADIKSICAEALCALRRYPQIYTSSEKQLDLSITINISAKDFEAMQKIMPASQRAVTSPPQA  
ATAD2A (H. sapiens) 631 CVCYGADIKSICAEALCALRRYPQIYTSSEKQLDLSITINISAKDFEAMQKIMPASQRAVTSPPQA

**AAA1**

Yta7 (S. cerevisiae) 688 LPELTKPLADQLNNKKNLDYMLNIKDTTFQRNTS..LLQNFID.YEE...SGE...EEHD...KY...GGN  
Abol (S. pombe) 541 LSP...LKPLLEAFQDIETKLQRLVASKLNPL.....E.EVM...DDP..  
lex-1 (C. elegans) 667 LDERTSLLGDTVNSLISLR...IP.....QGV...RCVENAMATA...  
ATAD2 (D. rerio) 655 LSCVLKPLLEPTLNQTLACLTRVFHAEELLHRETHDSDNHLLVE..DSYSECEGLASSIYTQSGSP  
ATAD2A (M. musculus) 356 LSAIVKPLQNNTVHRLDALQVFFHVEVGTNKSLSNDVSCPFLESDLA...SDD...TPSVYENGL.SQ  
ATAD2A (H. sapiens) 701 LSTVVKPLQNNTVHRLLEALQVFFHAEFRNTKSLSDISCPLESDLA...SDD...VPSVYENGL.SQ

|                     |      | AAA2                       |                                                             |                                     |                  |                                     |
|---------------------|------|----------------------------|-------------------------------------------------------------|-------------------------------------|------------------|-------------------------------------|
| Yta7 (S.cerevisiae) | 748  | EDT...SSFRSYEFF.ESMA       | ESQICKPRLLINCPK...GNGQ.QYVGAAAILNYLEEFNVQVQLDLASLVS         |                                     |                  |                                     |
| Abol (S.pombe)      | 582  | .KE...NDFEYQQR.L.ETFE      | TLRIYKPRLLICCRK...GLGQ.TALGPAILQQYEGVHVQSFDMSTLLQ           |                                     |                  |                                     |
| lex-1 (C.elegans)   | 702  | .....SSELEQVVRALFP         | NTPVPAIRLLLCGSEQLADGGOTSIVLPAILAKLHLPVFLSLVSSLLT            |                                     |                  |                                     |
| ATAD2 (D. rerio)    | 723  | KKAASCTTHKPLHFTTSAYQ       | OPTSYRPRLLLTGPQ...GAGOSTHLLAPALLHHLKFTVHRLDLPTLYS           |                                     |                  |                                     |
| ATAD2A (M.musculus) | 421  | K...ENLNFHLNRRNACY         | QPMSPRPRLLLVCEP...GFGQSSHLLAPAVIHLEKFTVYTLDTIPVLF           |                                     |                  |                                     |
| ATAD2A (H.sapiens)  | 766  | KSSHKAKDNFNFLHLNRRNACY     | QPMSPRPRLLLVCEP...GFGQSSHLLAPAVIHLEKFTVYTLDTIPVLF           |                                     |                  |                                     |
|                     |      | AAA2                       |                                                             |                                     |                  |                                     |
| Yta7 (S.cerevisiae) | 809  | ESRRTIAAIVVSF...MEAKKRQ    | PSVVFIPNLDIWINITIPENVILVLSGLFRSLQSNKTIILCLAEENL             |                                     |                  |                                     |
| Abol (S.pombe)      | 642  | DSTQSIETSIILHLF...LEVRRHTP | SIIIYIPDIDNWLNVLPITAITTFSSMLERLDFSDQILFLALSS.S              |                                     |                  |                                     |
| lex-1 (C.elegans)   | 764  | ..DGRPEEAFSNAIQSAMRASATGP  | CIMLLPSIDEWIKVIPVSVQHMLITCLESMTGFTTPIILFLSTLD.T             |                                     |                  |                                     |
| ATAD2 (D. rerio)    | 790  | VSAKTPPEESCAQVFR...EARRCV  | SIIYMPHISAWWEAISETVKSSFLMLLQDVPSTFTPIILATAE.S               |                                     |                  |                                     |
| ATAD2A (M.musculus) | 482  | ISTTSPPEEACSQMIR...EAKRTA  | SIVVPHIHLWWEIVGPTLKATFTTLLQTIIPSFAPVILLATSE.K               |                                     |                  |                                     |
| ATAD2A (H.sapiens)  | 833  | VSTTSPPEETCAQVIR...EAKRTA  | SIVVPHIHLWWEIVGPTLKATFTTLLQTIIPSFAPVILLATSD.                |                                     |                  |                                     |
|                     |      | linker arm                 |                                                             |                                     |                  |                                     |
| Yta7 (S.cerevisiae) | 876  | DISEVKNGLILSDFAFD.KNIF     | QLHKPSKENITRYFSNLTIELLKTSPSDIPMKRRVRK.PLPELQKQVTSNA         |                                     |                  |                                     |
| Abol (S.pombe)      | 708  | PLSELHPQLREWFSK.QSVYS      | LOYPTRDSIIAFQPILELIKASPTELPGGIPRKRRLVPLPLA...P              |                                     |                  |                                     |
| lex-1 (C.elegans)   | 831  | SFEDAPEYVTEIFRHANCIT..LNP  | SRRTIRQKYFEHVIEKINTPPKVF...PT...VYEMPLPD                    |                                     |                  |                                     |
| ATAD2 (D. rerio)    | 856  | VYQQLPDELKCIFSRSYGEVFC     | LSMPGEEARRKFFSDLLVQAAPRR...RKS.ACALEVTLSE                   |                                     |                  |                                     |
| ATAD2A (M.musculus) | 548  | PYSALPEEVQELFTHDYGEF       | FNVLQPKERTKFFEDLLKQASKPPVSQ...KKAVALQALEVLPVAP              |                                     |                  |                                     |
| ATAD2A (H.sapiens)  | 899  | PHSALPEEVQELFTHDYGEF       | FNVLQPKERTKFFEDLLKQASKPPISK...KKAVALQALEVLPVAP              |                                     |                  |                                     |
|                     |      | Bromodomain                |                                                             |                                     |                  |                                     |
| Yta7 (S.cerevisiae) | 944  | AFTNFDENGEP                | LSEKVVLRRLKLSFQHQDMRLKNVLKIKLSGLMD..LFKNYKRRFRKPPIDDAFLVHLF |                                     |                  |                                     |
| Abol (S.pombe)      | 774  | DPPPFTS...QKITL            | KTKQADMRLLNKLKLNALLG..SLRARIYKFRKKPLIDFNDIYC.V              |                                     |                  |                                     |
| lex-1 (C.elegans)   | 889  | DDSPDKSPSKRLNDDDET         | RELLKMY...TALQRMRLFFKERLTRLMRDRRFVEVPE...V                  |                                     |                  |                                     |
| ATAD2 (D. rerio)    | 920  | DPG...PRQLSAAEQ            | RRLEEQE...ENTLRELRLFLRDVTKRLATDKRFQVFSKP...V                |                                     |                  |                                     |
| ATAD2A (M.musculus) | 613  | PPE...PRPLTAEV             | KRLLEEQE...EDTFRELRLFLRNVTHRLAIDKRFVFTK...V                 |                                     |                  |                                     |
| ATAD2A (H.sapiens)  | 964  | PPE...PRSLTAEV             | KRLLEEQE...EDTFRELRLFLRNVTHRLAIDKRFVFTK...V                 |                                     |                  |                                     |
|                     |      | Bromodomain                |                                                             |                                     |                  |                                     |
| Yta7 (S.cerevisiae) | 1012 | EPETSND..PNWQPAYIKDENM     | ILEVSTGRKFFNMDL                                             | DIVEERLWNGYVSEPKQFLKDIEITYRDANTIG   |                  |                                     |
| Abol (S.pombe)      | 831  | DPETGHSYRSRECHYEFDDV       | VKQIGSDQKFSMMSLEEIEKRTWDNCCYCTPKQFVHDIKILRLDALQLE           |                                     |                  |                                     |
| lex-1 (C.elegans)   | 944  | DPDEADYIEI...I             | ...ETPICQDIMEKLNNCEYNHADKVFADLILITQTNALYEN                  |                                     |                  |                                     |
| ATAD2 (D. rerio)    | 970  | DIEEVDYLEV...I             | ...TOPMDLSAIMMKIDKKHYMVAKDFLADIDLITCSNLEYEN                 |                                     |                  |                                     |
| ATAD2A (M.musculus) | 663  | DPDEVPDYVTV...I            | ...KQPMDLSSVISKIDLHKYLTVKDYLKIDIDLITCSNLEYEN                |                                     |                  |                                     |
| ATAD2A (H.sapiens)  | 1014 | DPDEVPDYVTV...I            | ...KQPMDLSSVISKIDLHKYLTVKDYLKIDIDLITCSNLEYEN                |                                     |                  |                                     |
|                     |      | Bromodomain                |                                                             |                                     |                  |                                     |
| Yta7 (S.cerevisiae) | 1080 | D...RERVIKASEMFANAVQMG     | TEEISTPDIQECATRRQDRLERQELFLE..DE.....D                      |                                     |                  |                                     |
| Abol (S.pombe)      | 901  | D...SETIKRAQEMYANVLLG      | VEDMEDDQFSQRCERMALEAERKRLRHG..LQKHL.....D                   |                                     |                  |                                     |
| lex-1 (C.elegans)   | 995  | PSTTKDGKLIHQMANL           | LRDAIDDLLECELDSEVERIETVSRMLQDAVGT.....V                     |                                     |                  |                                     |
| ATAD2 (D. rerio)    | 1021 | PDKDPGDKIIRHRACSLK         | DAHAMASELDPEDRMCEELKESRRRRAQPTAPQPPVTPST..V                 |                                     |                  |                                     |
| ATAD2A (M.musculus) | 714  | PDRDPGDLIRHRACALRD         | TAYAILKEELEDDEQLCEEIQESRKKRGCSSSKYAPSYHHVMPKQNSPPV          |                                     |                  |                                     |
| ATAD2A (H.sapiens)  | 1065 | PDRDPGDLIRHRACALRD         | TAYAILKEELEDDEQLCEEIQESRKKRGCSSSKYAPSYHHVMPKQNSTLV          |                                     |                  |                                     |
|                     |      | Bromodomain                |                                                             |                                     |                  |                                     |
| Yta7 (S.cerevisiae) | 1129 | EKRAAMELEAKE.....          | QSQENILQEPDLKDNKANEF                                        |                                     |                  |                                     |
| Abol (S.pombe)      | 955  | ETKADMQFTSEK.....          | PSVDESITEVD..D.....                                         |                                     |                  |                                     |
| lex-1 (C.elegans)   | 1045 | ...PTSDKLLTEIPKGFARKK      | AWSMTNSLAKIEI.QWTS.....ER                                   |                                     |                  |                                     |
| ATAD2 (D. rerio)    | 1083 | ATRKKPMGEEAGLSSSG          | QGDGVDDKHCSNNIKRFRRRPIWGRGIIRKKKSYKKEEAEDDEPEE...EE         |                                     |                  |                                     |
| ATAD2A (M.musculus) | 784  | GDKKPDQEQNEKLVK            | PTPVACSTPAQLKRRKFKKSKWHVGTIKIRKKISQAKDNSLNAHMS...RS         |                                     |                  |                                     |
| ATAD2A (H.sapiens)  | 1135 | GDKKSDPEQNEKLVK            | PTSTPVACSTPAQLKRRKFKKSKWNVLGTIKIRKKISQAKDSSNAIDHKK...ES     |                                     |                  |                                     |
|                     |      | Bromodomain                |                                                             |                                     |                  |                                     |
| Yta7 (S.cerevisiae) | 1161 | GVAAGNQLQAQLQTTINT         | ASIVNNSEVPQPI                                               | DT...NLYK...KEIPAAIPSAVDKEKAVI..... |                  |                                     |
| Abol (S.pombe)      | 979  | AIKDGPPVLAET...TLT         | NSLME.DVGPENVDMDIEDNEIFT...NQSTMSVPSMLVEN.....              |                                     |                  |                                     |
| lex-1 (C.elegans)   | 1082 | EAENQKMLS                  | KLGVAAAPT...ELVVVPV...EDM..KSEEGTSTSTDGV                    | PAS.AGNKKKL..LK                     |                  |                                     |
| ATAD2 (D. rerio)    | 1147 | GAEDSTV.MAQGDACL           | T...DE..SSC...DTMELHPEKQPLQANGHVL                           | STEEENSCEPTAARDA                    |                  |                                     |
| ATAD2A (M.musculus) | 850  | DTEDSQHTAHHTEPGNT          | ...DE..SSV...EES...DKQ.NRLESNIDLKNNSSSNI                    | .....                               |                  |                                     |
| ATAD2A (H.sapiens)  | 1201 | DTEETQDTSVDHNETGNT         | ...GE..SSV...EEN...EKQONASESKLELRNNSNTCNI                   | .....                               |                  |                                     |
|                     |      | Bromodomain                |                                                             |                                     |                  |                                     |
| Yta7 (S.cerevisiae) | 1216 | ...PEDSGANEYTT.....        | ELIQAATCTSEITTDDBERA..RKEPKENEDSLQTQVT                      |                                     |                  |                                     |
| Abol (S.pombe)      | 1030 | ...EESPKPDEYIDQKDKV        | QSPLLNGKSPVGPSEALRV...ST...DVSTNIS                          |                                     |                  |                                     |
| lex-1 (C.elegans)   | 1137 | KGQKKS...TG.....           | ESEHDED..STVE                                               |                                     |                  |                                     |
| ATAD2 (D. rerio)    | 1204 | QGQEEAPSEETPVAPT           | VPAPQECVNGNESMDSV...YSEAPDKDTIKRDALEQKPTHEKEA..SGTE         |                                     |                  |                                     |
| ATAD2A (M.musculus) | 897  | ...ENELEEPKTEGTGE          | .....LRK.....DRIV                                           |                                     |                  |                                     |
| ATAD2A (H.sapiens)  | 1249 | ...ENELEDNRKTACTE          | .....LR.....DKIA                                            |                                     |                  |                                     |
|                     |      | Bromodomain                |                                                             |                                     |                  |                                     |
| Yta7 (S.cerevisiae) | 1263 | EENFSKIDANTNNINH           | VKEIQSVNKPNSLHETV.EKR...ERSPI.PKEV..V..EPEQGKKSDEKLI        |                                     |                  |                                     |
| Abol (S.pombe)      | 1076 | SNGRADIPVD...TLIT          | SPADVPNNAPTDAHNITSADG...HIENI.EQEV...FPDLV                  |                                     |                  |                                     |
| lex-1 (C.elegans)   | 1158 | DAGE...DITVENLEIKKN        | .QETPNSEHDIEMKDAS...KD...STPSVQ...ISIAEKELI                 |                                     |                  |                                     |
| ATAD2 (D. rerio)    | 1266 | CSTG...ENTRTAEAVAS         | ...DGHEKEGSSKGKECGKGLSEVQAEEPAVRQAEVQLPPPPDLV               |                                     |                  |                                     |
| ATAD2A (M.musculus) | 919  | CRGD...ASASQVTDIP          | ...EDSESKEMDFLRMTLARGSQVQEQLISMEQALAILSQPTPSLV              |                                     |                  |                                     |
| ATAD2A (H.sapiens)  | 1270 | CNGD...ASSSQIHLS           | ...DENEGKEMCVLRMTRARRSQVQEQQQLITVEKALAILSQPTPSLV            |                                     |                  |                                     |
|                     |      | C-terminal domain          |                                                             |                                     |                  |                                     |
| Yta7 (S.cerevisiae) | 1322 | LTPEQTKKVSAC               | LIEHCQNFVTSO                                                | IEDVHSSVAKI                         | IWKSKSAWDKTGTVDI | IKFLESE.....                        |
| Abol (S.pombe)      | 1126 | FDEDRLTPLKQL               | LIDSTGTFTVD                                                 | DLHLHSFLYQI                         | IWNTKSEWNRRNSVV  | DECERAVKEFMINALQ...                 |
| lex-1 (C.elegans)   | 1207 | VSKPATCEL                  | IQCCVEKSEGSVSE                                              | TERLSSVLSHT                         | IERFRDEWNRNENLPA | QLTQIVREWQTADDSNNTIV                |
| ATAD2 (D. rerio)    | 1325 | VDHQRLKALL                 | EQAVVKSEGFVSDH                                              | TERVFSALSQC                         | IYQHRRDYDKTRL    | IEAMERQVEHETFLL.....                |
| ATAD2A (M.musculus) | 977  | LDHKQLTNILKT               | VVKKSQKNIF                                                  | QENLYAVISQC                         | IYEHRRDYDKTALV   | QKMEQAVENFNCSSRS.....               |
| ATAD2A (H.sapiens)  | 1328 | VDHERLKNL                  | LKT                                                         | VVKKSQKNIF                          | QENLYAVISQC      | IYEHRRDKDHTSLIQKMEQAVENFNCSSRS..... |
|                     |      | Bromodomain                |                                                             |                                     |                  |                                     |
| Yta7 (S.cerevisiae) | 1277 | NGTLNKSNGNLANGH            |                                                             |                                     |                  |                                     |
| Abol (S.pombe)      |      |                            |                                                             |                                     |                  |                                     |
| lex-1 (C.elegans)   |      |                            |                                                             |                                     |                  |                                     |
| ATAD2 (D. rerio)    |      |                            |                                                             |                                     |                  |                                     |
| ATAD2A (M.musculus) |      |                            |                                                             |                                     |                  |                                     |
| ATAD2A (H.sapiens)  |      |                            |                                                             |                                     |                  |                                     |

Supplementary Fig. 1 Sequence alignment shows the conserved domain organization of the ATAD2 family.

Multiple alignment of ATAD2 genes from different species. ATAD2 homologs from *S. cerevisiae* (Yta7), *S. pombe* (Abo1), *C. elegans* (lex-7), *D. rerio*, *M. musculus*, and *H. sapiens* were aligned using the Clustal W program and displayed using ESPRIPT3.0. The conserved domains are labeled. Red represents 100% identity among sequences, yellow represents a similarity score of  $> 0.7$ .

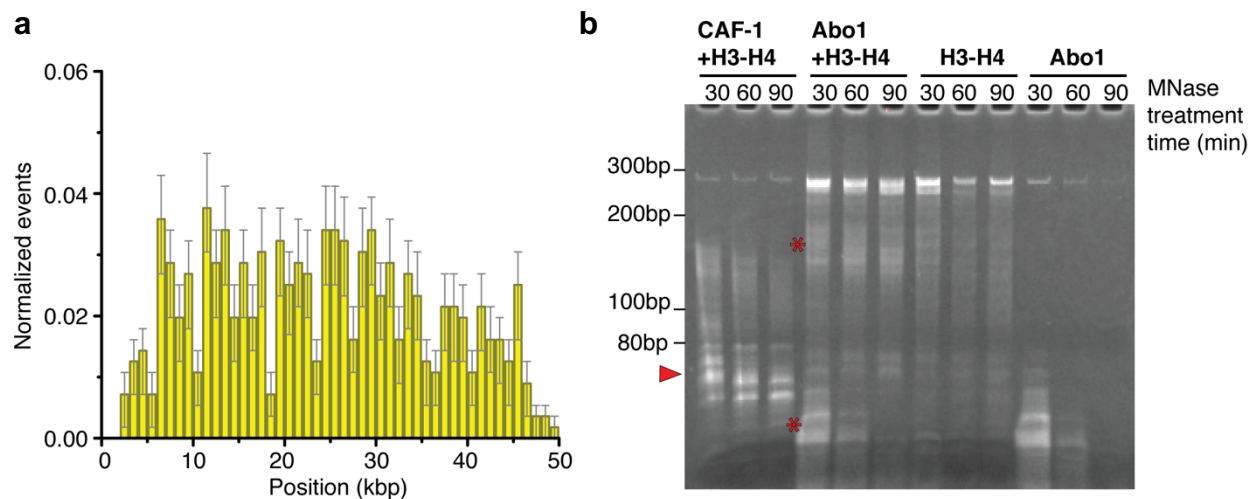

### Supplementary Fig. 2 Characteristics of Abo1-mediated H3-H4 DNA deposition.

**a.** Histogram of H3-H4 loading positions on DNA, which was built up by collecting the center coordinates of 2 D Gaussian function for fitting fluorescence intensity of individual Cy5-H3-H4 histones in Fig. 2b. Distribution of peak positions show the sequence independence of Abo1-mediated H3-H4 loading (N=597 molecules). Error bars were obtained by bootstrapping with a 70% confidence interval.

**b.** Results of MNase digestion of 269 bp DNA when mixed with histone H3-H4, CAF-1+H3-H4, Abo1+H3-H4, or Abo1. MNase digestion products were separated by 8% native PAGE. Major digestion products of CAF-1 are labeled with an arrow, and major protected fragments of Abo1 and histone H3-H4 are labeled with asterisks.

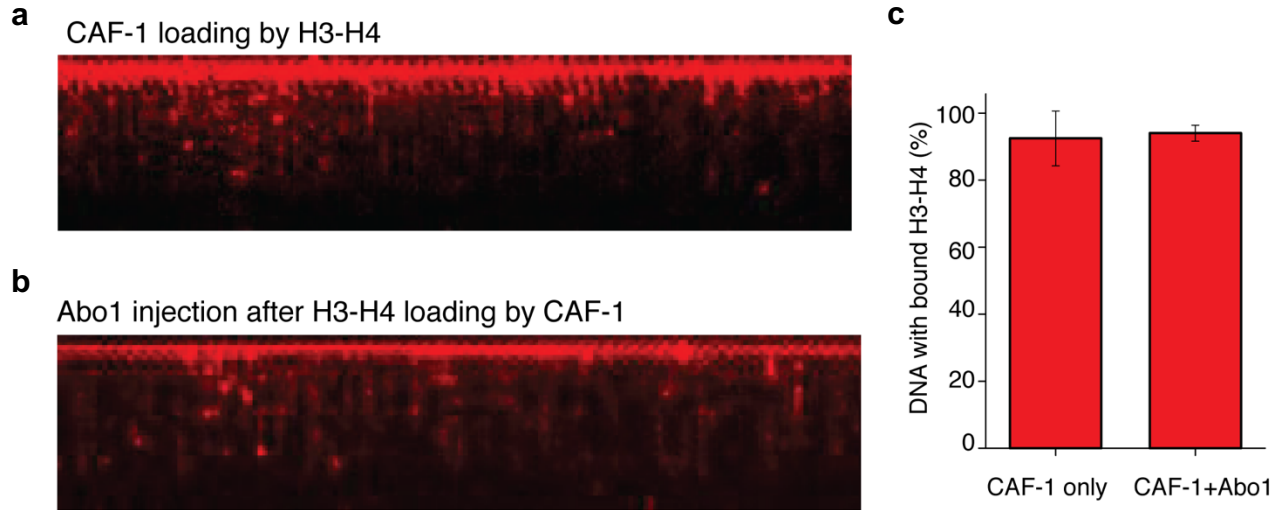

**Supplementary Fig. 3 Absence of H3-H4 unloading from DNA by Abo1.**

**a** Image of DNA curtains, on which Cy5-H3-H4 histones were loaded by yCAF-1.

**b** Image of DNA curtains after 15-minute Abo1 incubation with Cy5-H3-H4 pre-loaded by yCAF-1 in the above (Full movies shown in Video S3 and S4).

**c** DNA fractions with bound H3-H4, which were quantified from DNA curtain data when H3-H4 was loaded onto DNA by yCAF-1 (in a) and when Abo1 is subsequently added to the pre-loaded H3-H4 by yCAF-1 (in b). (DNA molecules analyzed for each experiment are 200, N=200). The data were obtained from three independent experiments and error bars represent SD.

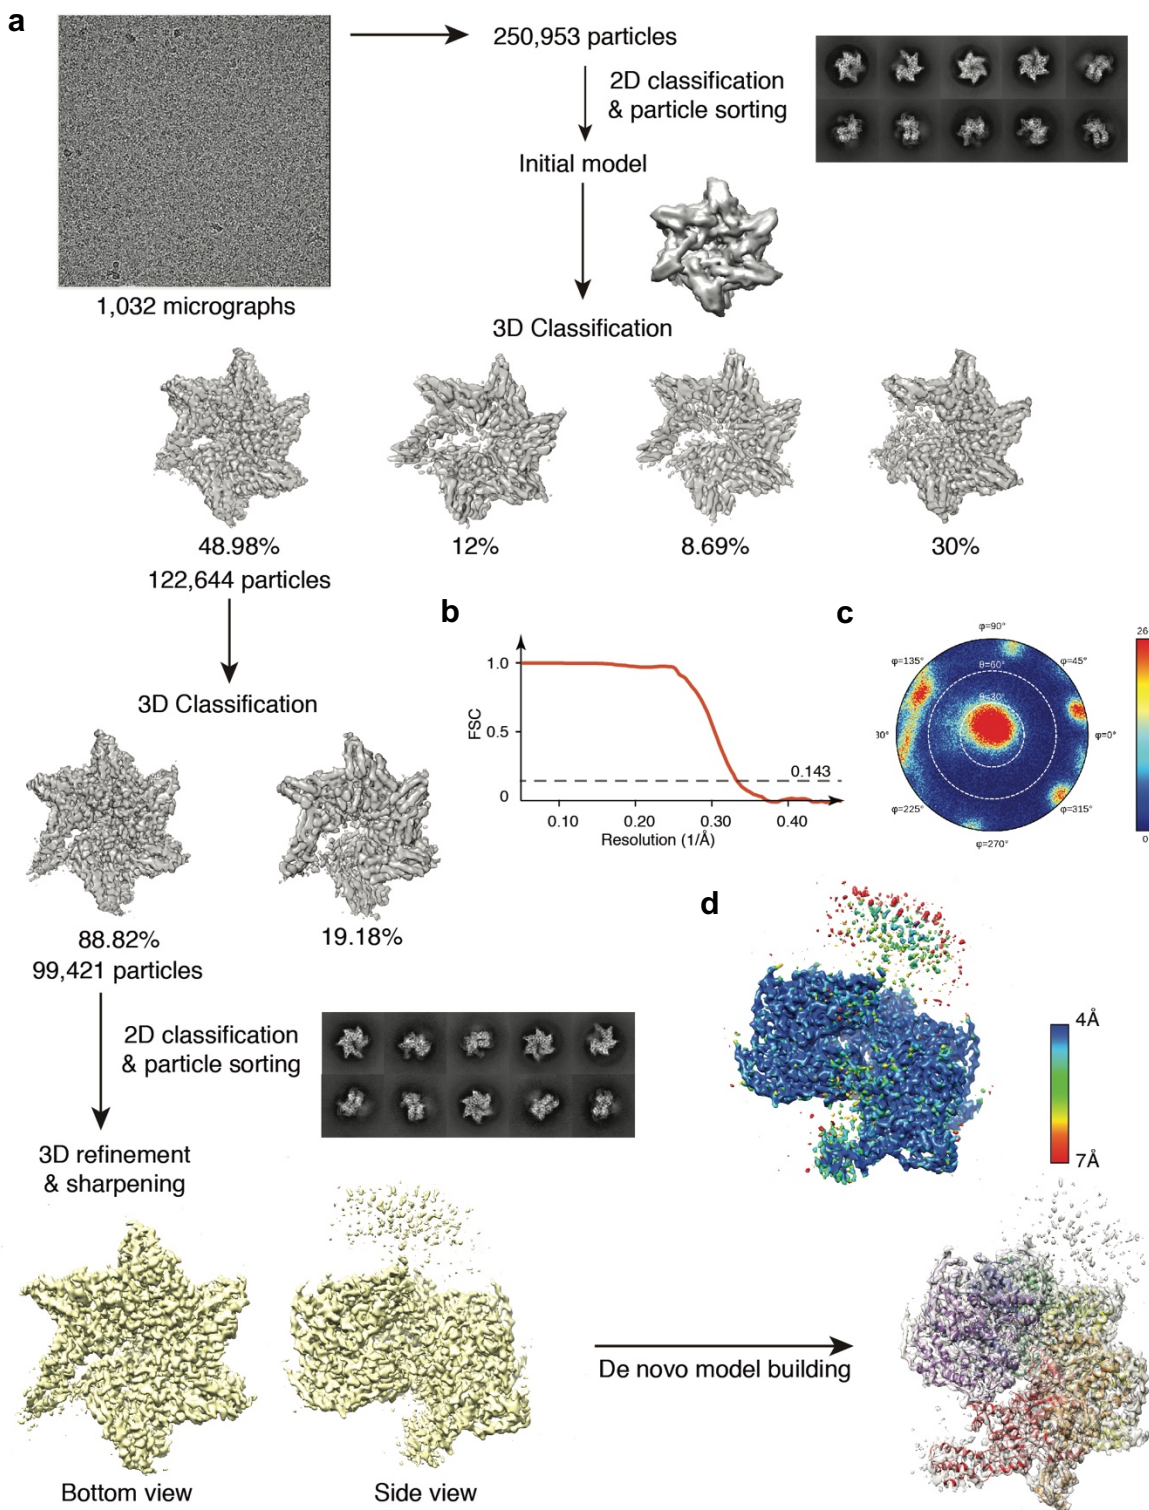

**Supplementary Fig. 4 Workflow of cryo-EM data processing and cryo-EM data validation for the ATP-Abo1 Walker B mutant**

- a** Workflow of cryo-EM data processing of ATP-Abo1 Walker B mutant. All processing was performed with cisTEM.
- b** Gold standard FSC curve of the cryo-EM reconstruction.
- c** Angular distribution plot of particles for the final refinement.
- d** Local resolution distribution of the cryo-EM map analyzed by ResMap.

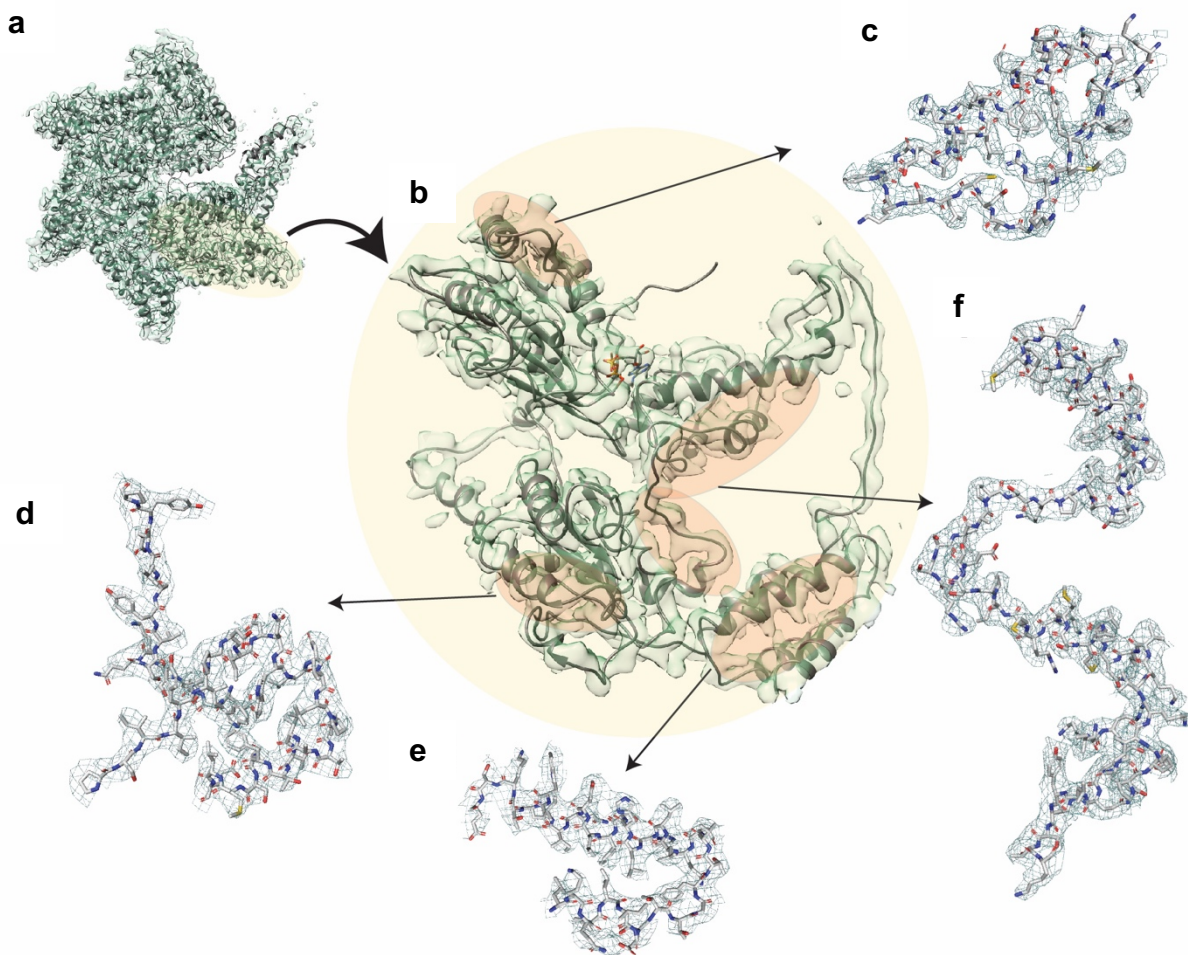

**Supplementary Fig. 5 Electron density map and fit of the ATP-Abo1 structural model**

**a** Overall cryo-EM map of ATP-Abo1 Walker B mutant with the Abo1 structure built *de novo*.

**b** Cryo-EM density and structure of subunit E.

**c- f** Cryo-EM densities and structures of a.a. 330-367 (**c**), a.a. 662-730 (**d**), a.a. 1132-1166 (**e**), and a.a. 491-566 (**f**).

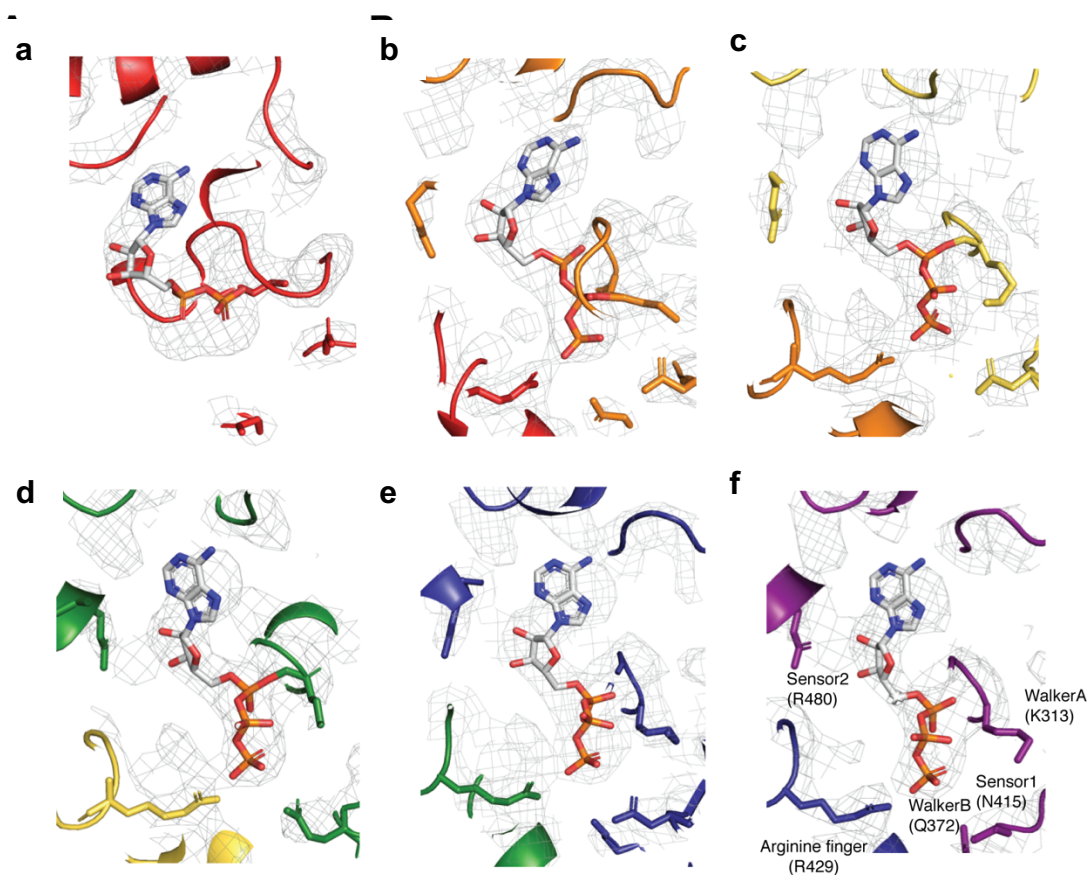

**Supplementary Fig. 6 Electron density fit of nucleotides with conserved AAA+ residues**

**a-f** Cryo-EM density and fit of nucleotides of subunit A-F. ATP molecules were built for subunits B-F, while an ADP molecule was built for subunit A. Side chains of K313 in the Walker A motif, Q372 in the Walker B motif, N415 in the sensor I motif, R480 in the sensor II motif and R429 of the arginine finger are depicted in each figure, and labeled in figure (f).

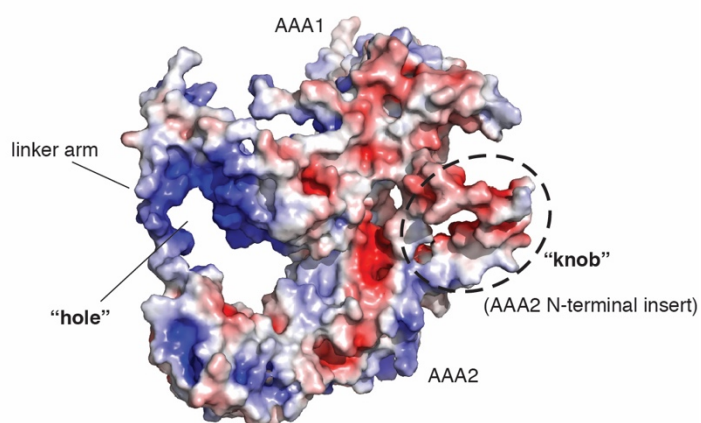

**Supplementary Fig. 7 Electrostatic potential surface map of an individual Abo1 subunit.**

The Abo1 electrostatic potential surface map of an Abo1 subunit (subunit E) highlighting the positive charge surface of the "hole" and the negative charge surface of the knob.

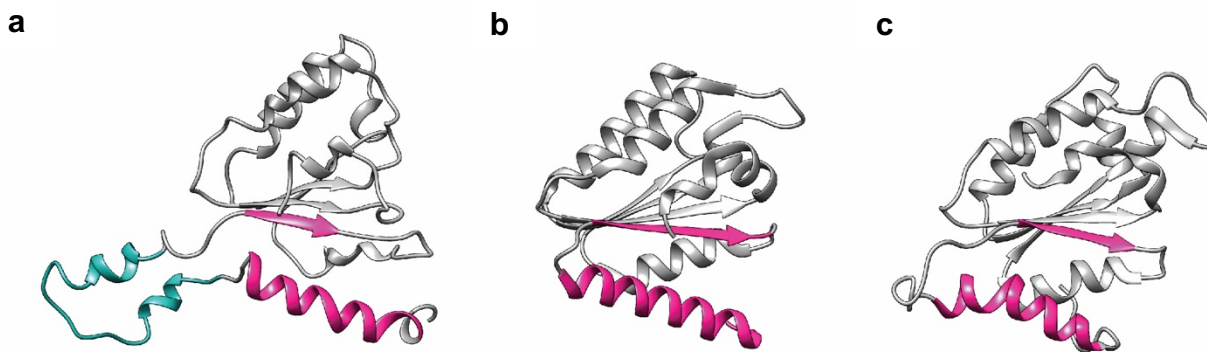

**Supplementary Fig. 8 Structure and position of the AAA2 knob insert**

**a** The  $\alpha 0$ - $\beta 1$  insert (teal) in the Abo1 AAA2 domain that forms the “knob” structure that inserts into the “hole” of the adjacent AAA subunit.  $\alpha 0$  and  $\beta 1$  are depicted in hot pink.

**b, c** Corresponding view of the NSF (PDB ID: 3j94) and p97 (PDB ID: 5ftm) AAA2 domains with  $\alpha 0$  and  $\beta 1$  in hot pink.

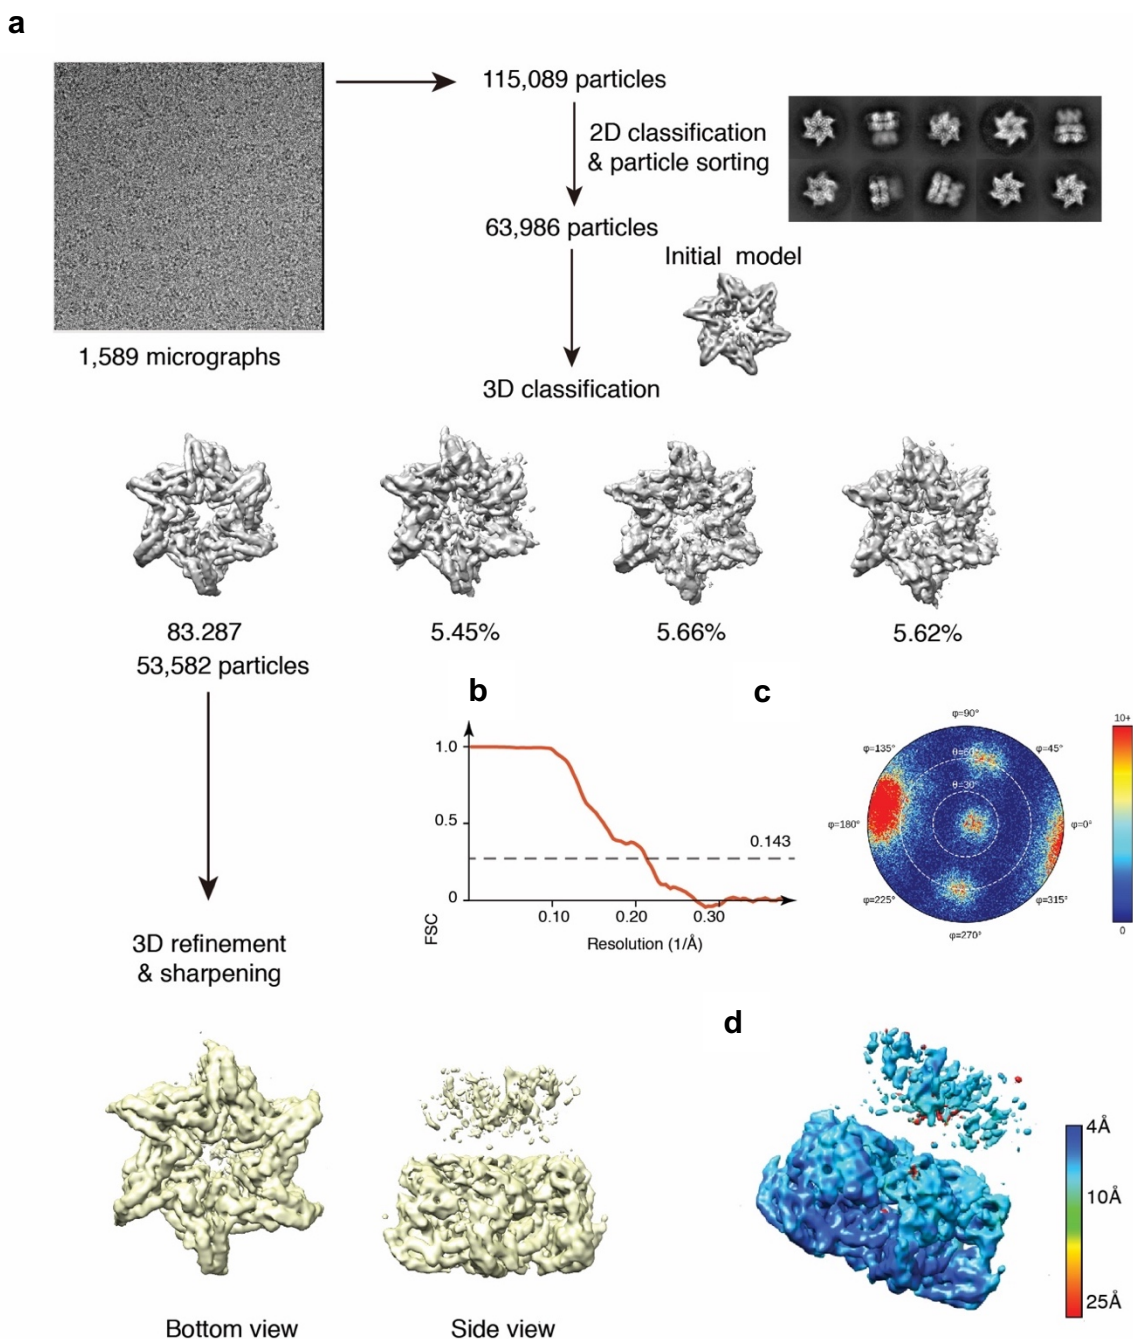

**Supplementary Fig. 9 Workflow of cryo-EM data processing and validation for ADP-Abo1.**

**a** Workflow of cryo-EM data processing of ADP-Abo1 performed with cisTEM.

**b** Gold standard FSC curve of the cryo-EM reconstruction.

**c** Angular distribution plot of particles for the final refinement.

**d** Local resolution distribution of the cryo-EM map analyzed by ResMap (8).

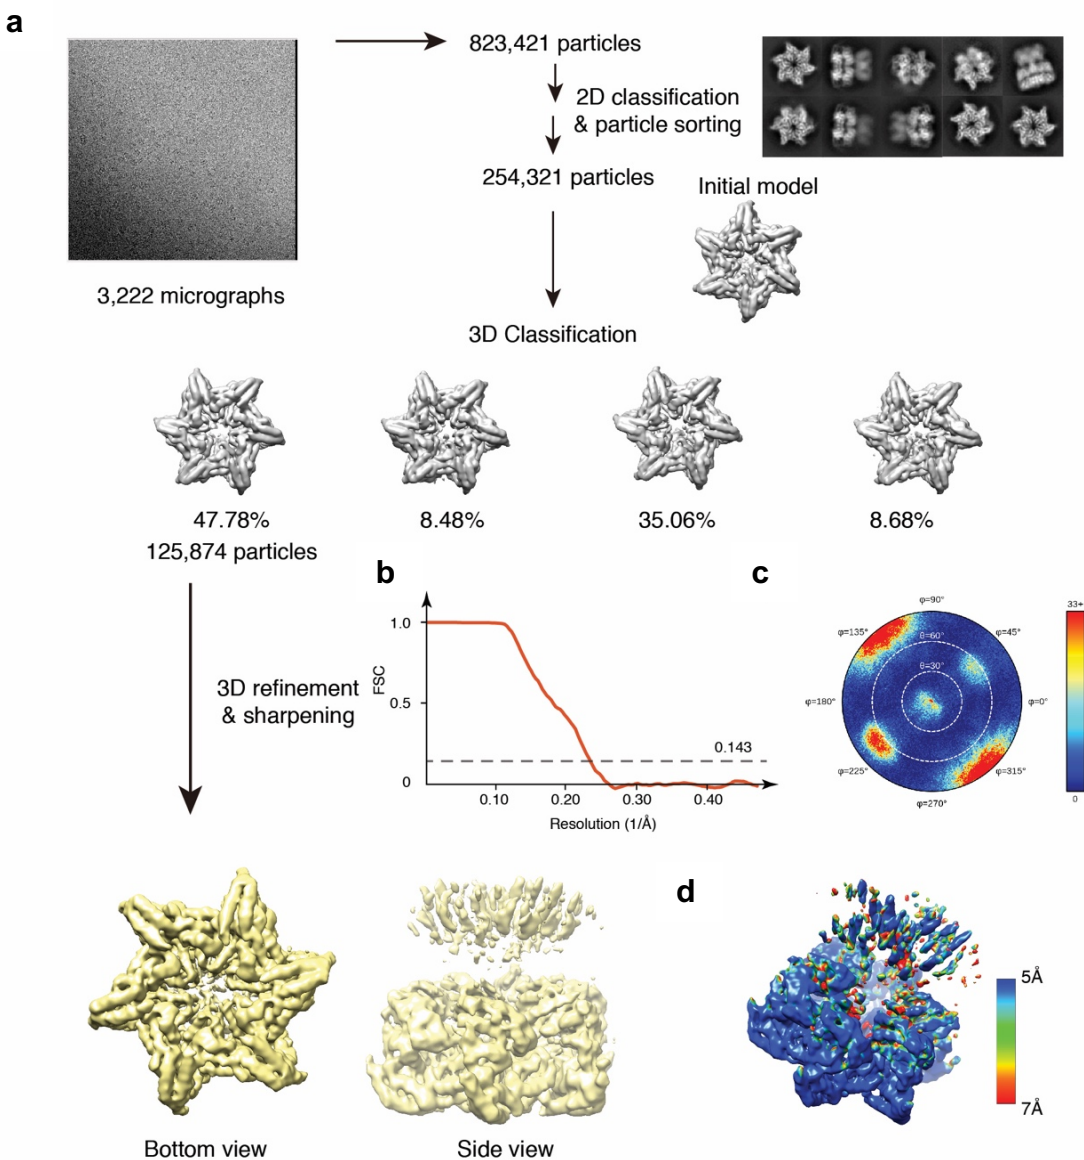

**Supplementary Fig. 10 Workflow of cryo-EM data processing and validation for apo-Abo1.**

**a** Workflow of cryo-EM data processing of apo-Abo1 performed with cisTEM.

**b** Gold standard FSC curve of the cryo-EM reconstruction.

**c** Angular distribution plot of particles for the final refinement.

**d** Local resolution distribution of the cryo-EM map analyzed by ResMap.

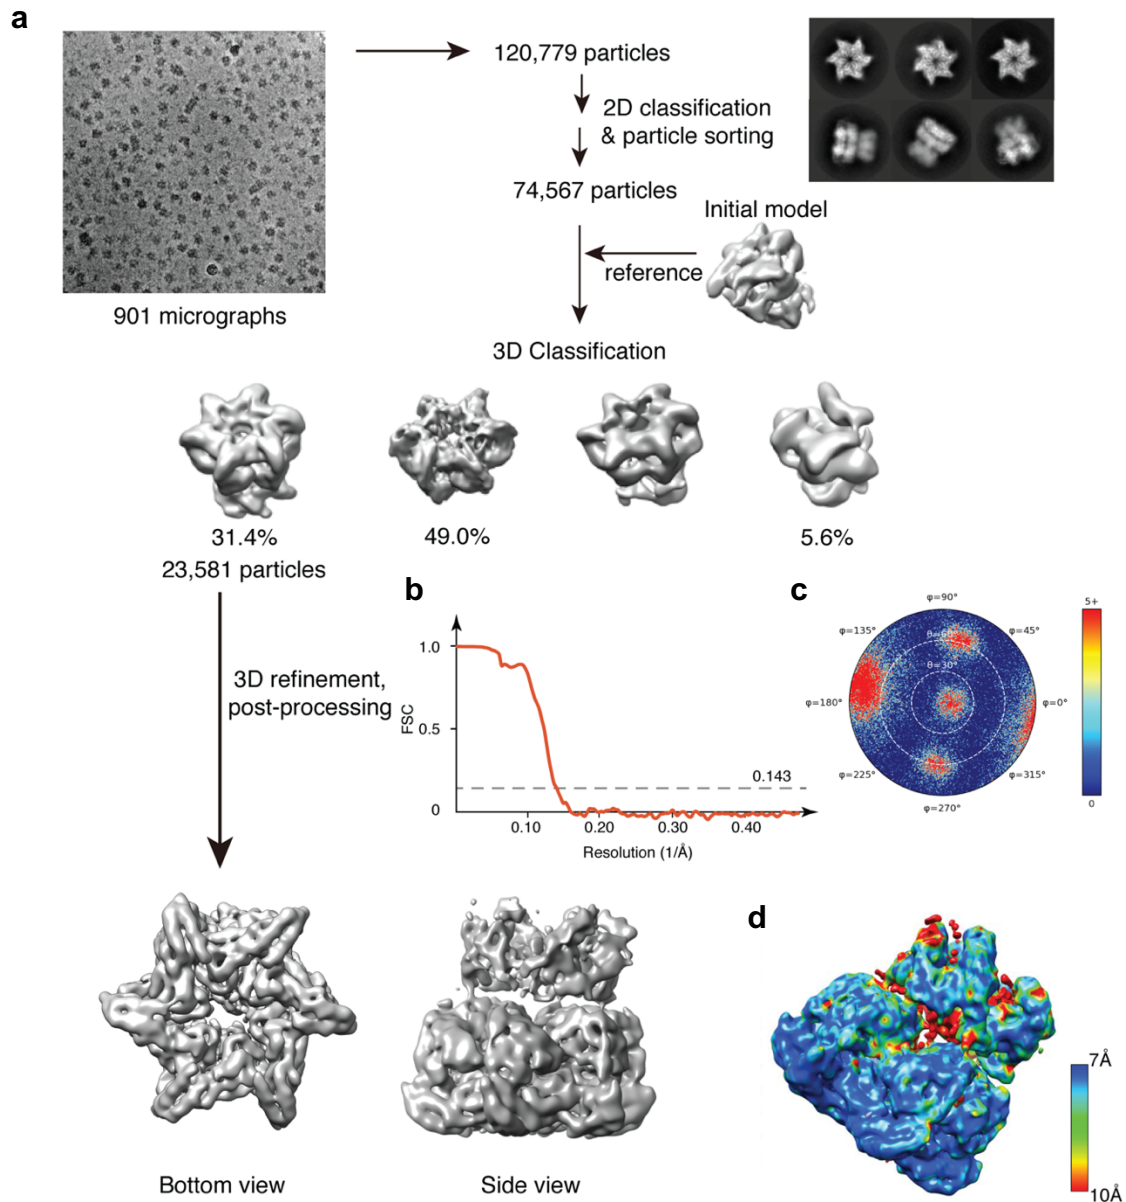

**Supplementary Fig. 11 Workflow of cryo-EM data processing and validation for apo-Abo1 structure with improved bromodomain density.**

**a** Workflow of cryo-EM data processing of apo-Abo1 performed with Relion 3.0.

**b** Gold standard FSC curve of the cryo-EM reconstruction.

**c** Angular distribution plot of particles for the final refinement.

**d** Local resolution distribution of the cryo-EM map analyzed by ResMap.

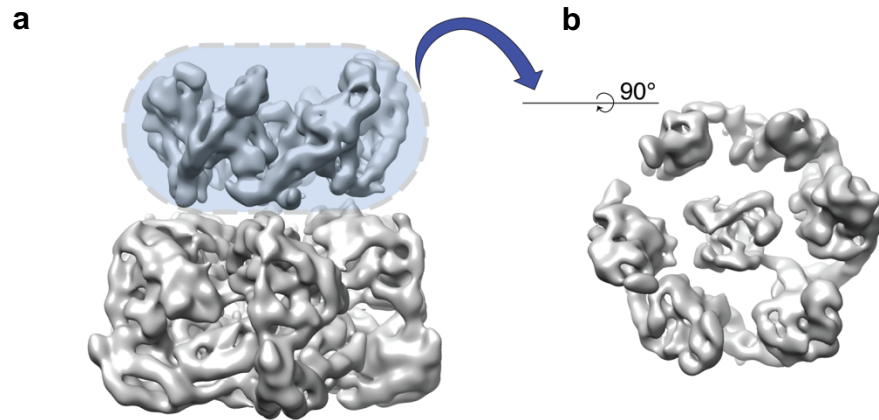

**Supplementary Fig. 12 Structure of the Abo1 bromodomains**

**a** Side view of Abo1 in the apo state showing discrete densities for the bromodomain (top) and the AAA+ ring (bottom).

**b** Top view of the bromodomain, showing six lobes of density arranged in a ring around a lobe of central density.

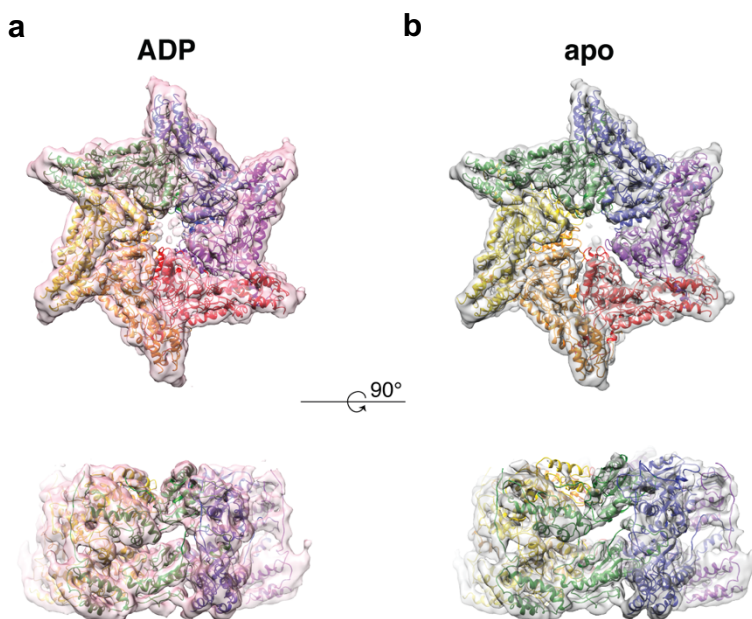

**Supplementary Fig. 13 MDFF fit of ADP-Abo1 and apo-Abo1 structures**

**a** Fit of the ADP-Abo1 model created by MDFF into the cryo-EM density map, shown with the bottom (AAA2) view (top panel), and side view (bottom panel).

**b** Fit of the apo-Abo1 model created by MDFF into the cryo-EM density map, shown with the bottom (AAA2) view (top panel), and side view (bottom panel).

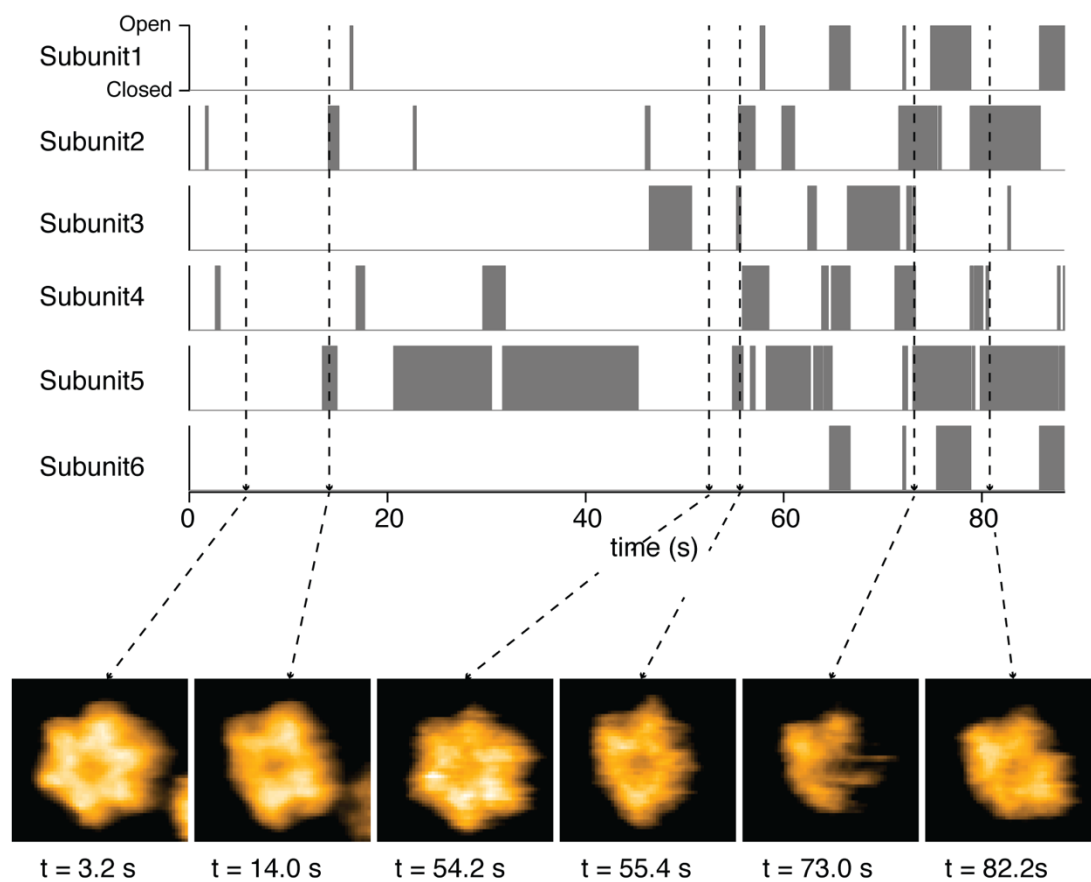

**Supplementary Fig. 14 Examples of Abo1 AAA+ ring at more than one position.**

HS-AFM snapshots (bottom) and subunit analysis (top) of transient states where more than one Abo1 subunit seems to disappear from the field of view.

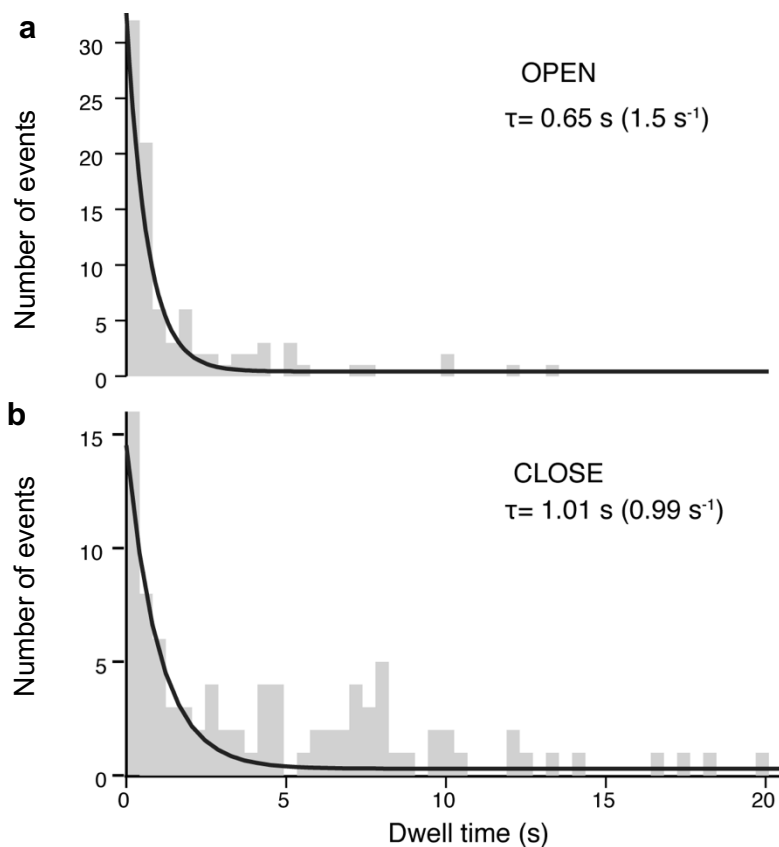

### Supplementary Fig. 15 Dwell time analysis of Abo1 ring opening and closing

**a, b** Histograms of dwell times for open (a) and closed (b) states in the presence of 2mM ATP (N=90 for opening, N=102 for closing). Both distributions were fitted with a single exponential decay function,  $A * \exp(-t/\tau)$ , where  $\tau$  is the time constant. Based on these constants, the rate of ring opening is  $1.5 \text{ s}^{-1}$ , and closing is  $0.99 \text{ s}^{-1}$ .

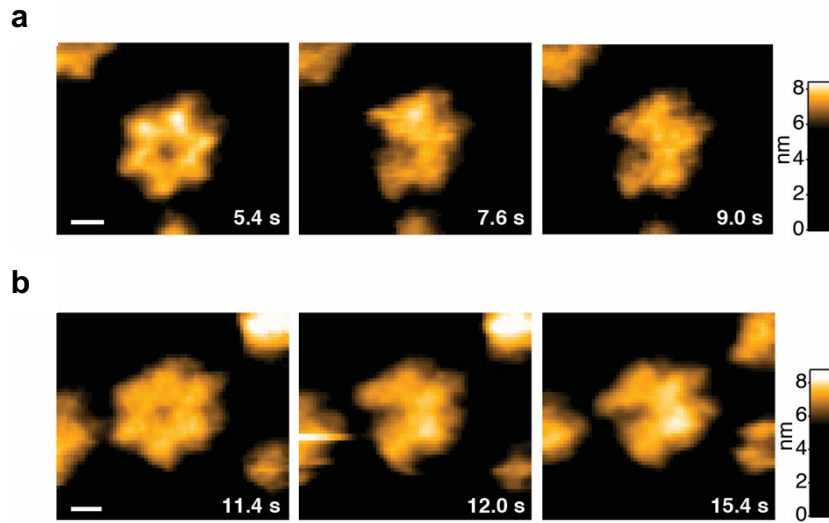

**Supplementary Fig. 16 HS-AFM movie frames of Abo1 Walker B mutant with ATP.**

**a, b** Two examples of Abo1 Walker B mutant molecules in the presence of 2mM ATP. Both molecules undergo a symmetry breaking event to produce an asymmetric spiral as in the cryo-EM structure, and are stuck in the same asymmetric state.



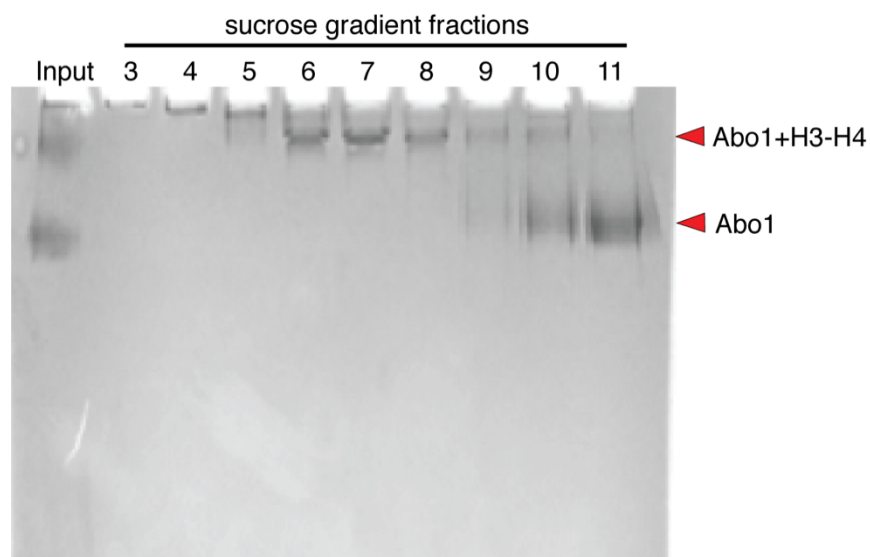

**Supplementary Fig. 18 Preparation of Abo-H3-H4 sample for crosslinking mass spectrometry analysis.**

Native gel analysis of DSS-crosslinked and sucrose gradient fractionated Abo1-H3H4 complex. Abo1-H3H4 complex was separated from Abo1 by sucrose gradients and fractions 6 and 7 were used for mass spectrometric analysis.

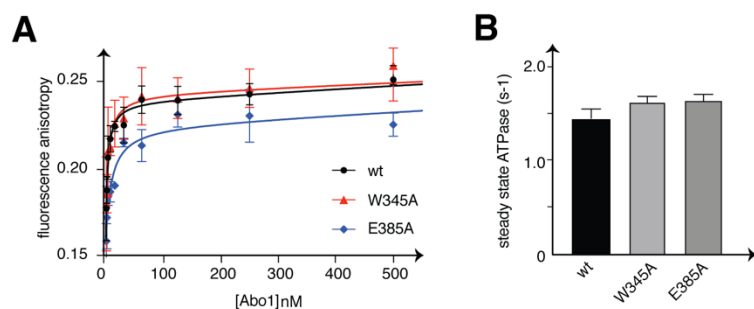

**Supplementary Fig. 19 Binding affinity and ATPase activity of Abo1 pore loop mutants.**

**a** Binding affinities of wild-type and pore loop mutant Abo1 for H3-H4 as measured by changes in fluorescence anisotropy. The respective binding affinities ( $K_d$ ) of wild-type, W345A, and E385A are,  $13 \pm 3$  nM,  $14 \pm 9$  nM, and  $19 \pm 16$  nM. Measurements are from three independent experiments and error bars represent SEM.

**b** Steady-state ATPase activity of wild-type and pore loop mutant Abo1. Measurements are from three independent experiments and error bars represent SEM.

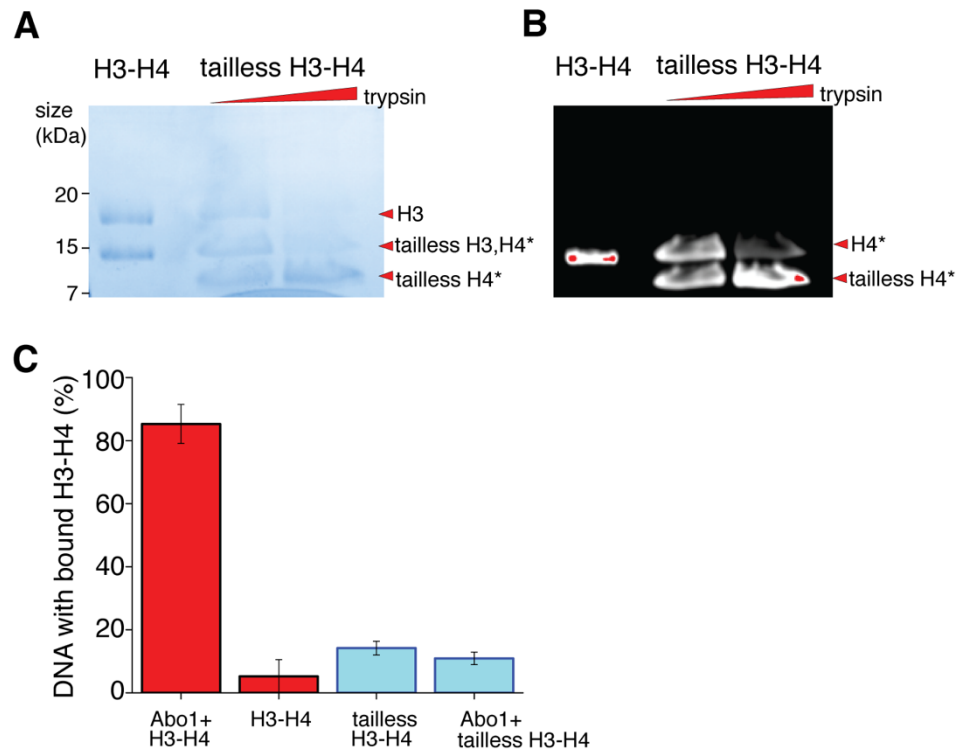

### Supplementary Fig. 20 Abo1-mediated DNA loading of tailless histone H3-H4

**a** Coomassie stained SDS-PAGE of Cy5-labeled-H3-H4\* cleaved with trypsin. Cy5 was labeled on histone H4 aa 71 and indicated with asterisks.

**b** Cy5 scan of SDS-PAGE of Cy5-labeled-H3-H4\* cleaved with trypsin.

**c** Comparison of the H3-H4 loading activity on DNA by quantification of fraction DNA bound with labeled H3-H4.

**Supplementary Table 1. Cryo-EM data collection, processing, and validation statistics**

|                                                              | ATP-Walker B<br>(E372Q) Abo1 | ADP wtAbo1     | Apo wtAbo1     | Apo<br>wtAbo1 -2        |
|--------------------------------------------------------------|------------------------------|----------------|----------------|-------------------------|
| <b>Data collection</b>                                       |                              |                |                |                         |
| Microscope                                                   | Titan Krios                  |                |                | Titan Krios<br>with VPP |
| Detector                                                     | Falcon3                      | Falcon3        | Gatan K2       | Gatan K2                |
| Mode                                                         | Electron Counting            |                |                |                         |
| Voltage (kV)                                                 | 300                          |                |                |                         |
| Total electron exposure<br>(e <sup>-</sup> /Å <sup>2</sup> ) | 59                           | 48.96          | 75             | 40.60                   |
| Frames (used/collected)                                      | 39/59                        | 47/48          | 39/50          | 39/40                   |
| Dose per fraction<br>(e <sup>-</sup> /Å <sup>2</sup> /sec)   | 1.00                         | 1.02           | 1.50           | 1.04                    |
| Exposure time (sec)                                          | 120                          | 37.75          | 10             | 10 sec                  |
| Defocus range (μm)                                           | 1-3.5                        | 1.5-3.5        | 1-3.5          | 1-3.5                   |
| Pixel size<br>(Å/pixel)                                      | 1.12                         | 0.673          | 1.06           | 1.04                    |
| Micrographs<br>(used/collected)                              | 918/1032                     | 1159/1589      | 2761/3222      | 901/1158                |
| <b>Data processing</b>                                       |                              |                |                |                         |
| Symmetry imposed                                             | C1                           | C1             | C1             | C1                      |
| Initial particle (no.)                                       | 425,696                      | 115,089        | 823,421        | 120,779                 |
| Final particle images (no.)                                  | 99,421                       | 53,582         | 125,874        | 23,581                  |
| Final map resolution (Å)                                     | 3.54                         | 4.44           | 4.27           | 6.9                     |
| <b>Model Validation</b>                                      |                              |                |                |                         |
| Bonds (RMSD)<br>- length (Å)<br>- angles (°)                 | 0.010<br>1.258               | 0.043<br>3.542 | 0.057<br>3.727 | N/A                     |
| Ramachandran plot<br>(% outliers/allowed/favored)            | 0.6/13.5/85.9                | 4.5/10.0/85.5  | 4.3/9.9/85.8   | N/A                     |
| CC between map and model                                     | 0.85                         | 0.80           | 0.78           | N/A                     |

**Supplementary Table 2. Intermolecular crosslinks between Abo1 and H3-H4**

| Crosslinked peptide sequence   | Protein1 | Protein2 | Position1 | Position2 | LD score |
|--------------------------------|----------|----------|-----------|-----------|----------|
| GADCLSKWVGEAER-TKQTAR          | abo1     | H3       | 344       | 4         | 33.56    |
| KKIIEIHTR-TKQTAR               | abo1     | H3       | 446       | 4         | 33.14    |
| KKIIEIHTR-KQLATK               | abo1     | H3       | 446       | 18        | 30.31    |
| KPLIDFNDIYCVDPETGHSYR-KLPFQR   | abo1     | H3       | 819       | 64        | 28.98    |
| KQLATK-LLNKLK                  | H3       | abo1     | 18        | 798       | 28.64    |
| KIIEIHTR-KSTGGK                | abo1     | H3       | 446       | 9         | 28.56    |
| FKKPLIDFNDIYCVDPETGHSYR-KLPFQR | abo1     | H3       | 819       | 64        | 28.21    |
| FKKPLIDFNDIYCVDPETGHSYR-KLPFQR | abo1     | H3       | 818       | 64        | 27.6     |
| KIIEIHTR-STGGKAPR              | abo1     | H3       | 446       | 14        | 27.18    |
| LRHGKLQK-STGGKAPR              | abo1     | H3       | 948       | 14        | 26.38    |
| RLQIDPKTIK-KSTGGK              | abo1     | H3       | 510       | 9         | 26.07    |
| KKIIEIHTR-KSTGGKAPR            | abo1     | H3       | 446       | 14        | 25.97    |
| DAVTYTEHAKR-IKLNALLGSLR        | H4       | abo1     | 77        | 802       | 24.65    |
| DALQLEDSETIKR-DNIQGITKPAIR-    | abo1     | H4       | 906       | 31        | 23.46    |
| DALQLEDSETIKR-VTIMPKDIQLAR     | abo1     | H3       | 906       | 122       | 22.96    |
| SREECHYEFVDDVVKQIGSDQK-TKQTAR  | abo1     | H3       | 854       | 4         | 21.26    |

\* Only Abo1-histone peptide crosslinks with an LD-score higher than 20 are shown.

\*\* Position denotes amino acid number in each protein.

**Supplementary Table 3. Intramolecular crosslinks in Abo1**

| Crosslinked peptide sequence                     | Position1 | Position2 | Domain      | LD score |
|--------------------------------------------------|-----------|-----------|-------------|----------|
| LLN <b>K</b> LK-I <b>K</b> LNALLGSLR             | 798       | 802       | bromo-bromo | 38.99    |
| Q <b>T</b> KQADMR-I <b>K</b> LNALLGSLR           | 789       | 802       | bromo-bromo | 35.77    |
| <b>K</b> GADCLSK-LLN <b>K</b> LK                 | 337       | 798       | AAA1-bromo  | 34.62    |
| ITL <b>K</b> QTK-LLN <b>K</b> LK                 | 786       | 798       | bromo-bromo | 34.48    |
| ITL <b>K</b> QTK-I <b>K</b> LNALLGSLR            | 786       | 802       | bromo-bromo | 33.94    |
| <b>K</b> VSFYMR-I <b>K</b> LNALLGSLR             | 329       | 802       | AAA1-bromo  | 29.46    |
| <b>K</b> GADCLSK-I <b>K</b> LNALLGSLR            | 337       | 802       | AAA1-bromo  | 28.98    |
| <b>K</b> VSFYMR-K <b>K</b> IIEIHTR               | 330       | 446       | AAA1-AAA1   | 24.93    |
| Q <b>T</b> KQADMR-HG <b>K</b> LQK                | 789       | 948       | bromo-bromo | 24.68    |
| GVLFGPPGTG <b>K</b> TLMAR-LLN <b>K</b> LK        | 313       | 798       | AAA1-bromo  | 24.00    |
| <b>K</b> GADCLSK-K <b>K</b> IIEIHTR              | 337       | 446       | AAA1-AAA1   | 23.57    |
| ITL <b>K</b> QTK-HG <b>K</b> LQK                 | 786       | 948       | bromo-bromo | 23.35    |
| DFVMSM <b>K</b> R-I <b>K</b> LNALLGSLR           | 524       | 802       | AAA1-bromo  | 23.13    |
| I <b>K</b> LNALLGSLR-DALQLEDSET <b>K</b> R       | 802       | 906       | bromo-bromo | 21.82    |
| ITL <b>K</b> QTK-LRHG <b>K</b> LQK-              | 786       | 948       | bromo-bromo | 21.72    |
| GADCL <b>S</b> KWVGAEAR-TLQ <b>K</b> LMPVASK     | 344       | 562       | AAA1-AAA1   | 20.99    |
| <b>K</b> VSFYMR- <b>K</b> GADCLSK                | 329       | 337       | AAA1-AAA1   | 20.88    |
| QFVHDI <b>K</b> LILR-LQ <b>K</b> HLD <b>E</b> TK | 890       | 951       | bromo-bromo | 20.00    |

\* Only Abo1-histone peptide crosslinks with an LD-score higher than 20 are shown.
